# Supplementary figures and images for: Anti-Interleukin-1 Beta/Tumor Necrosis Factor-Alpha IgY Antibodies Reduce Pathological Allergic Responses in Guinea Pigs with Allergic Rhinitis
Source: Hindawi journal article supplement (doi:10.1155/2016/3128182), 2016-01-01

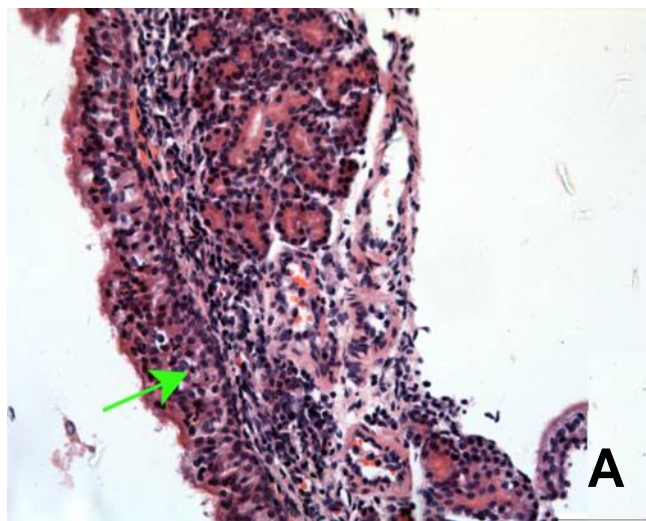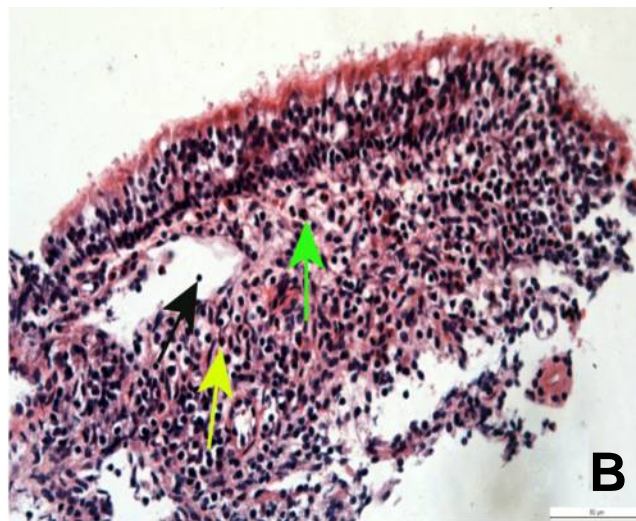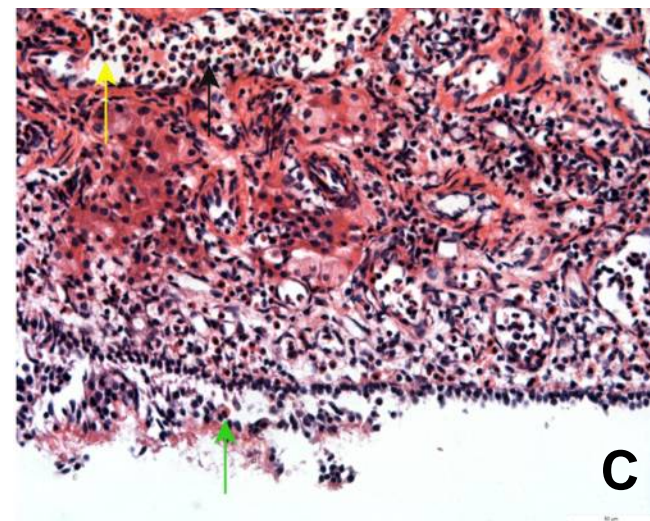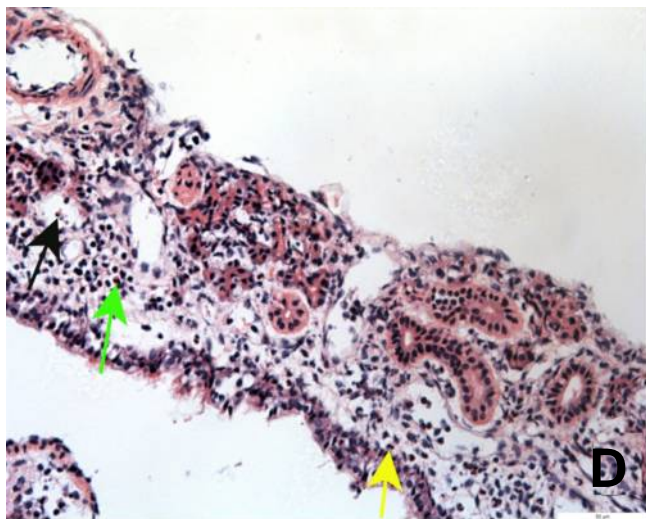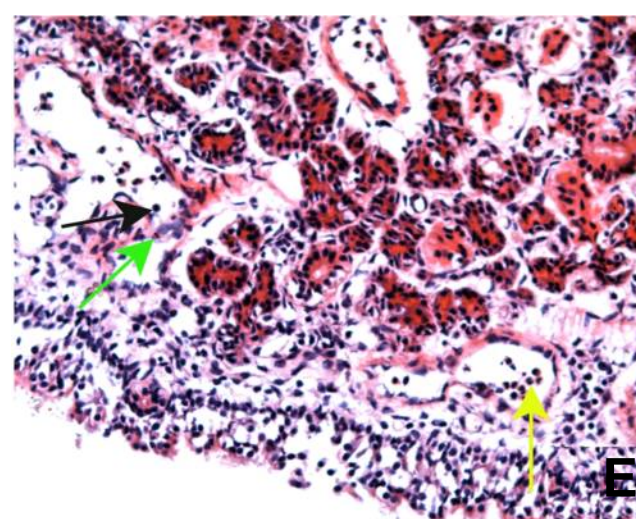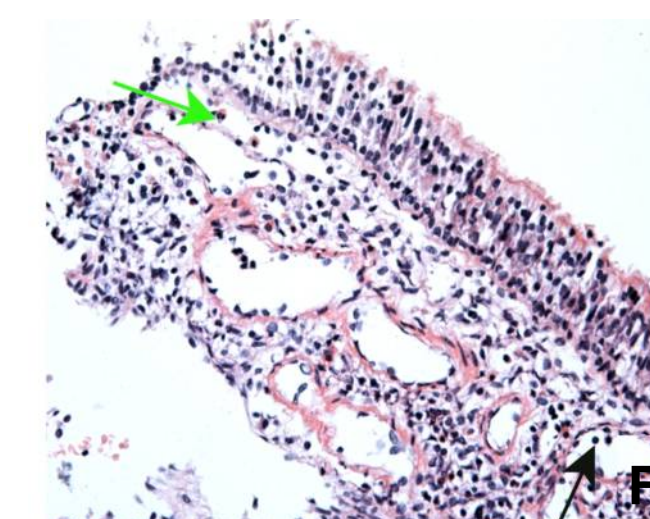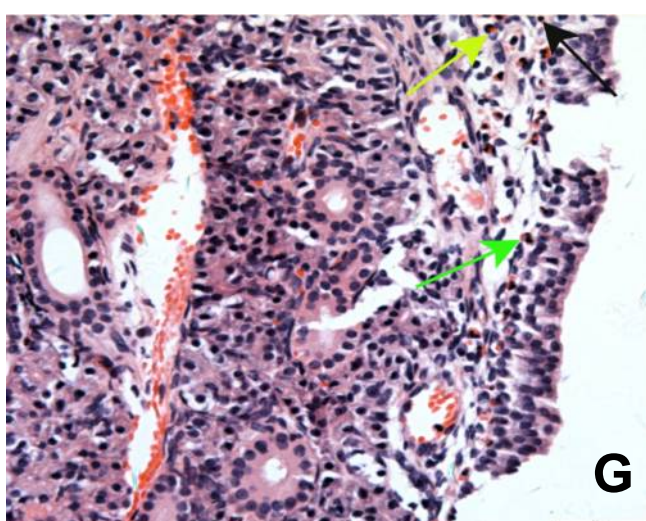

Supplement: f1 [file 3128182.f1.zip]

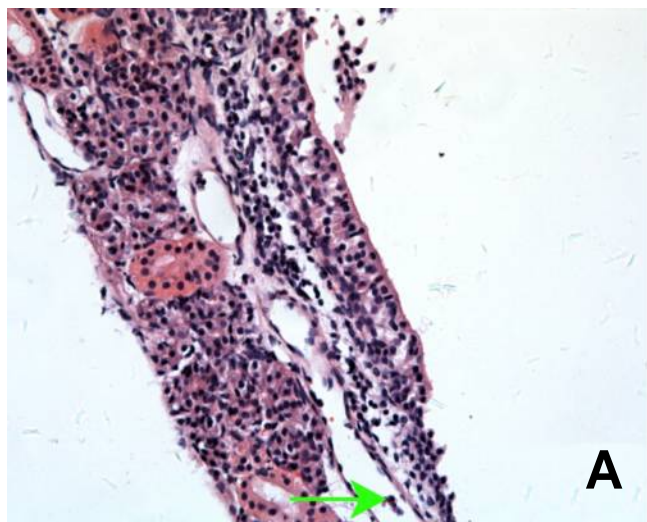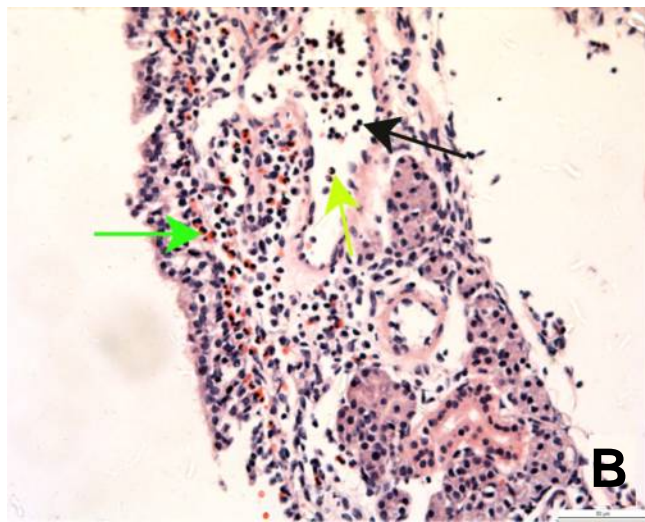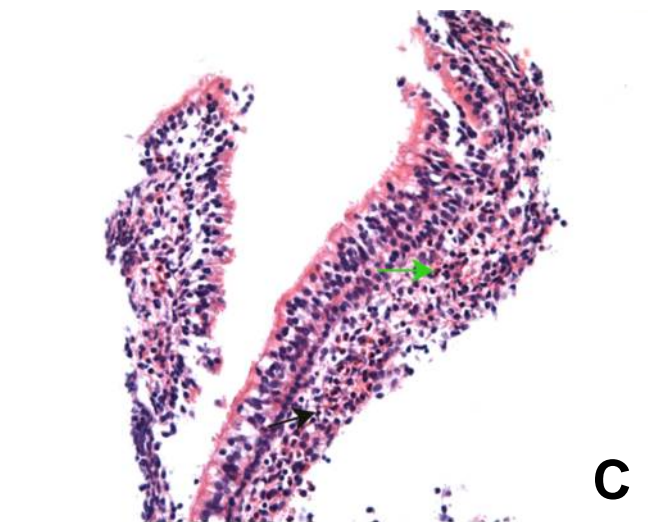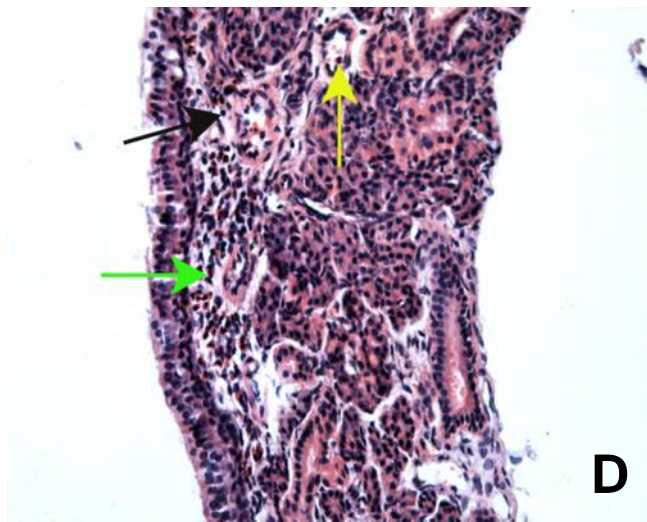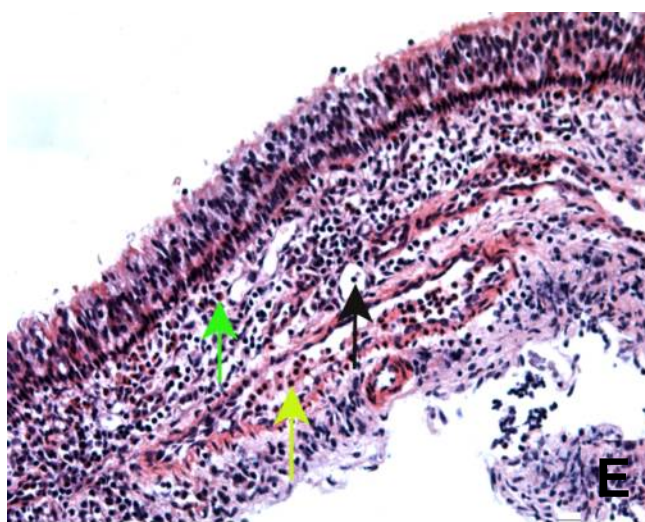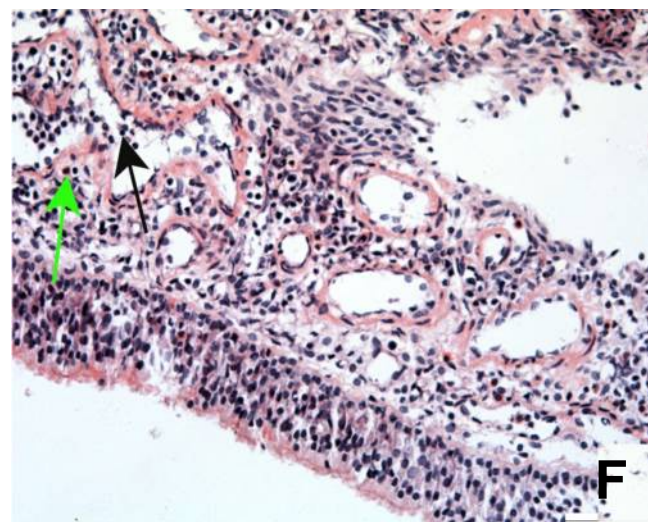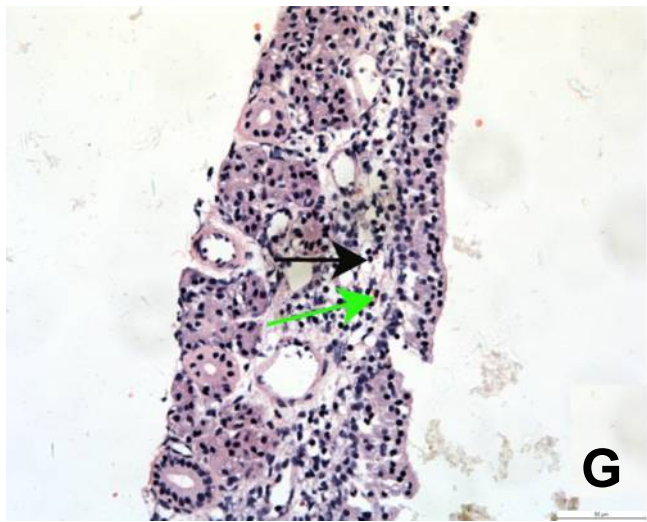

Supplement: f1 [file 3128182.f1.zip]

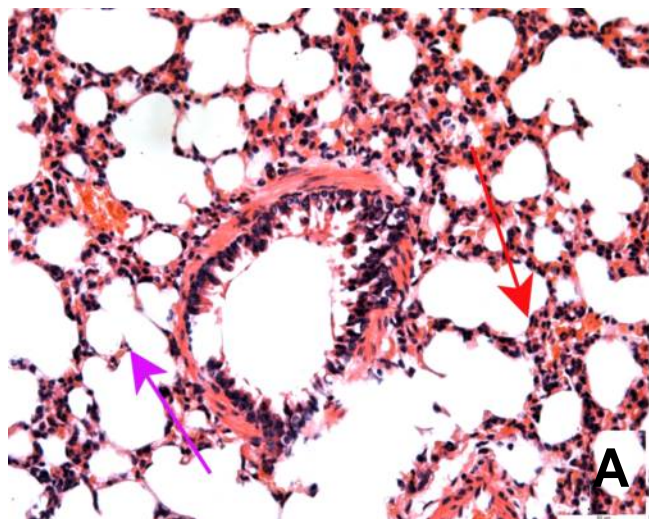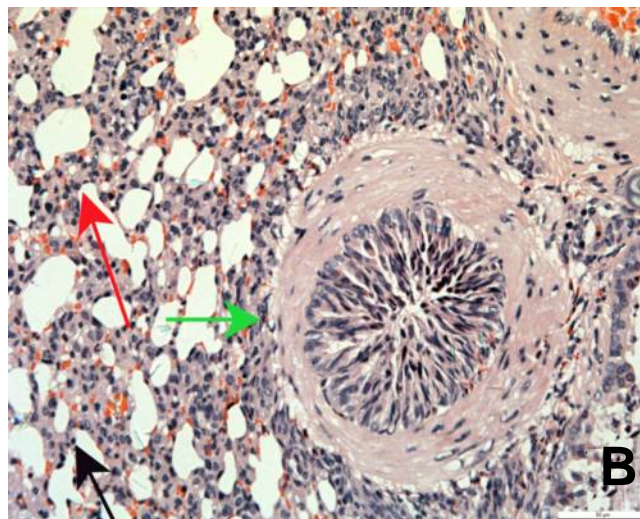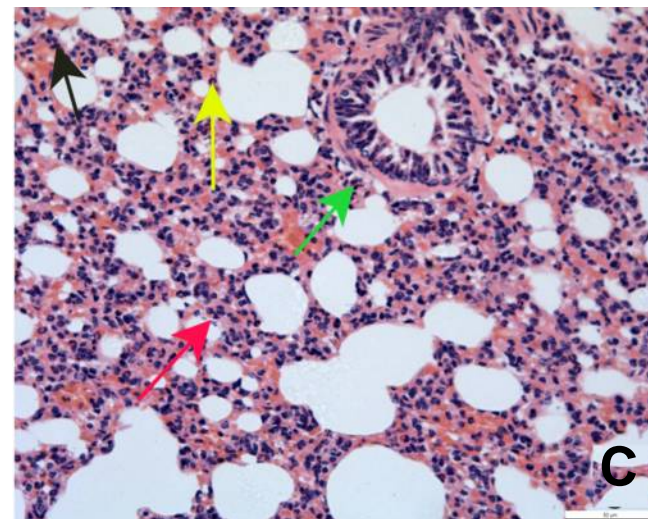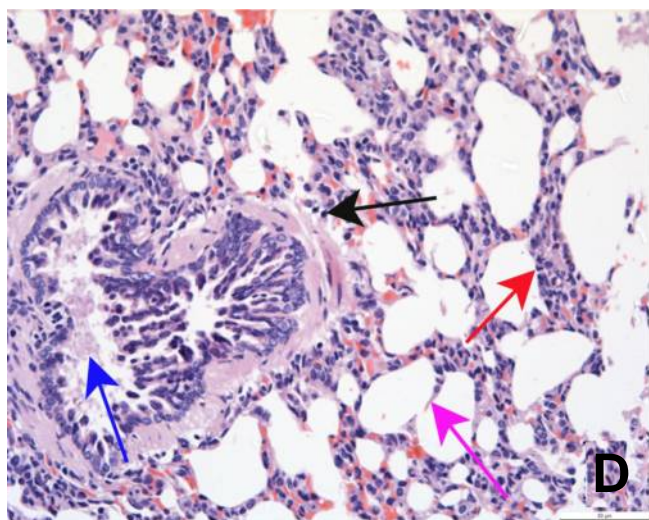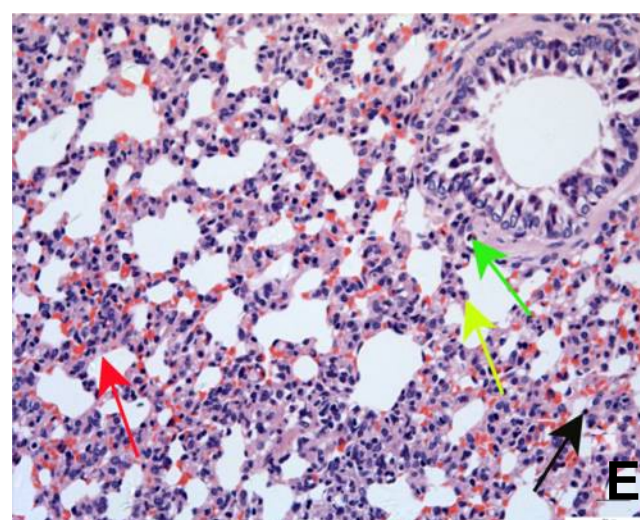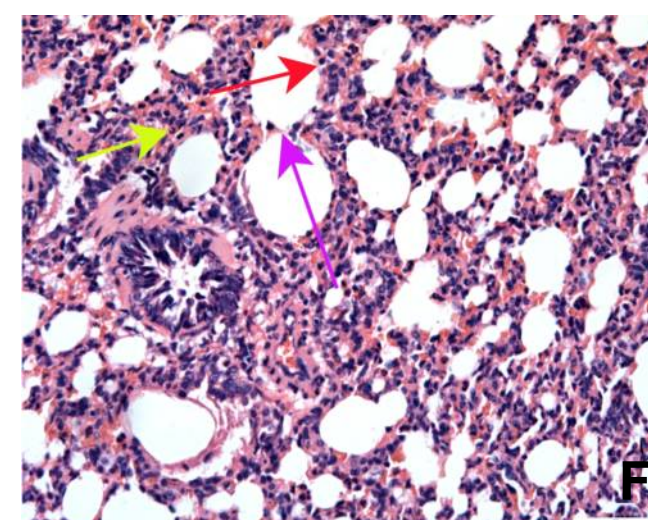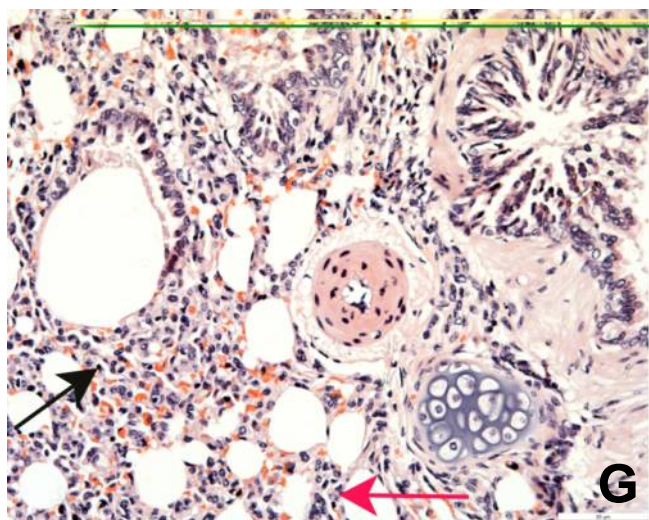

Supplement: f1 [file 3128182.f1.zip]

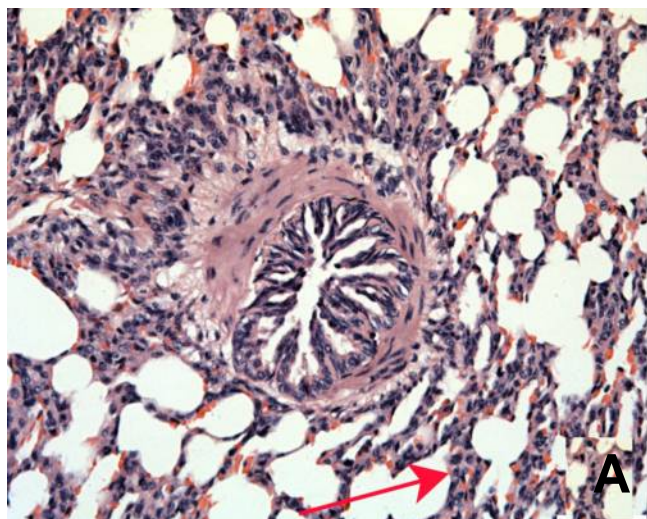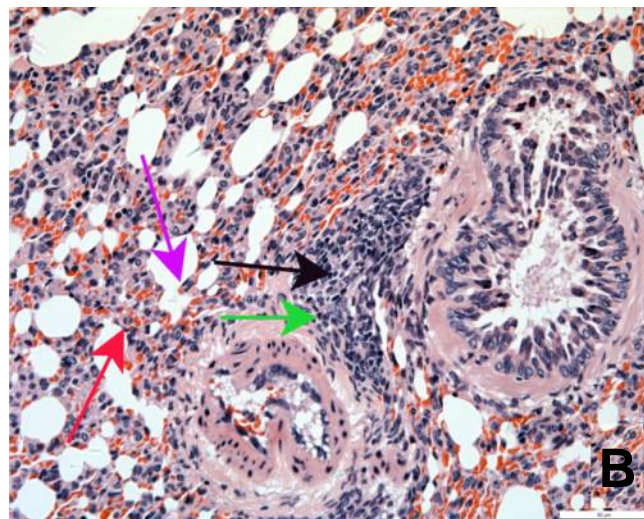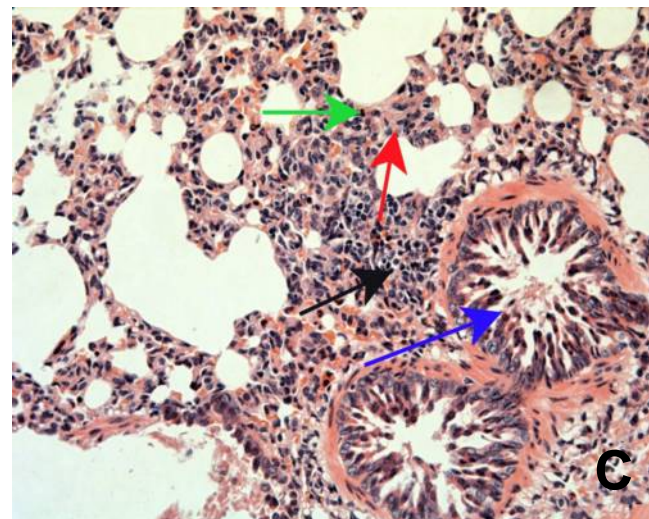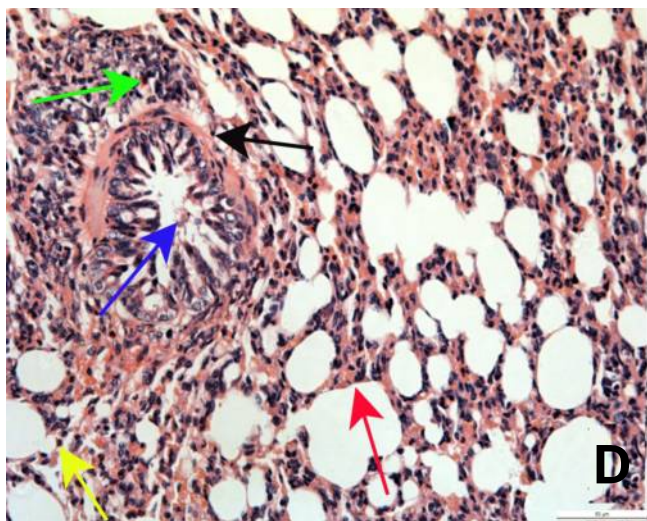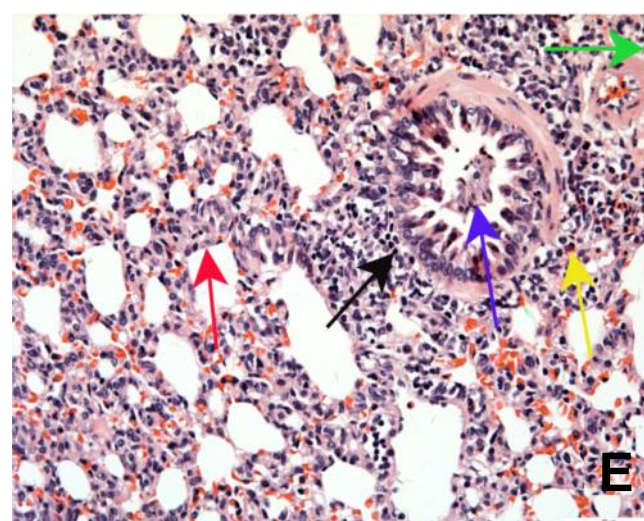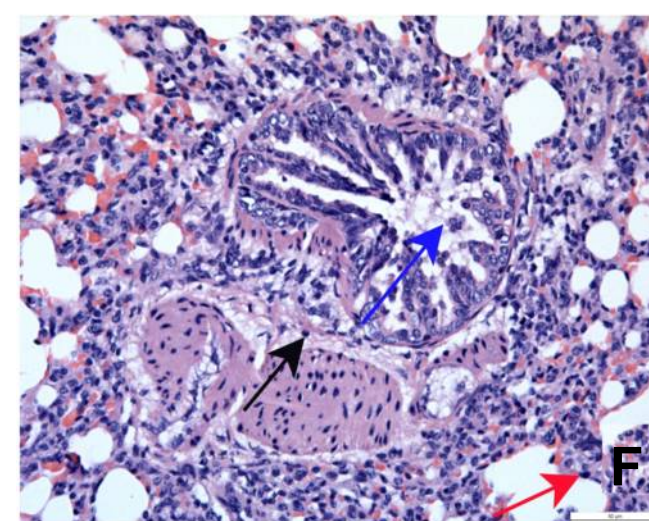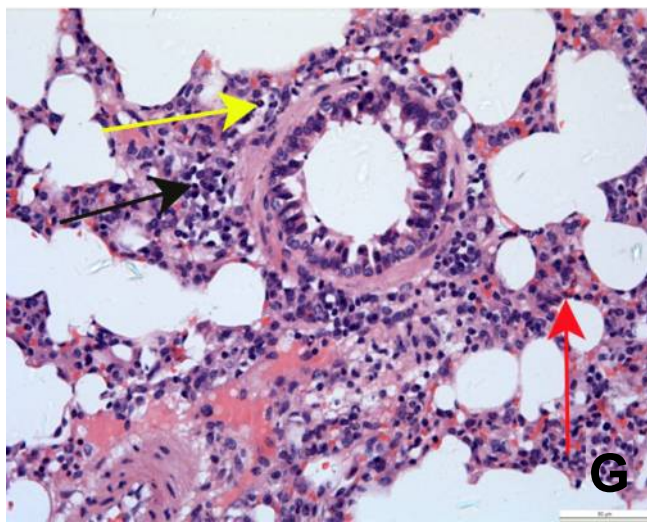

Supplement: f1 [file 3128182.f1.zip]
